# Supplementary material for: Synthesis and Anticancer Activities of 4-[(Halophenyl)diazenyl]phenol and 4-[(Halophenyl)diazenyl]phenyl Aspirinate Derivatives against Nasopharyngeal Cancer Cell Lines
Source: Hindawi journal article supplement (doi:10.1155/2017/6760413), 2017-01-01
Supplement: f1 [file 6760413.f1.pdf]

### FTIR for 2.3. General Method for the Synthesis of Halogenated Azo Compounds 1a–d

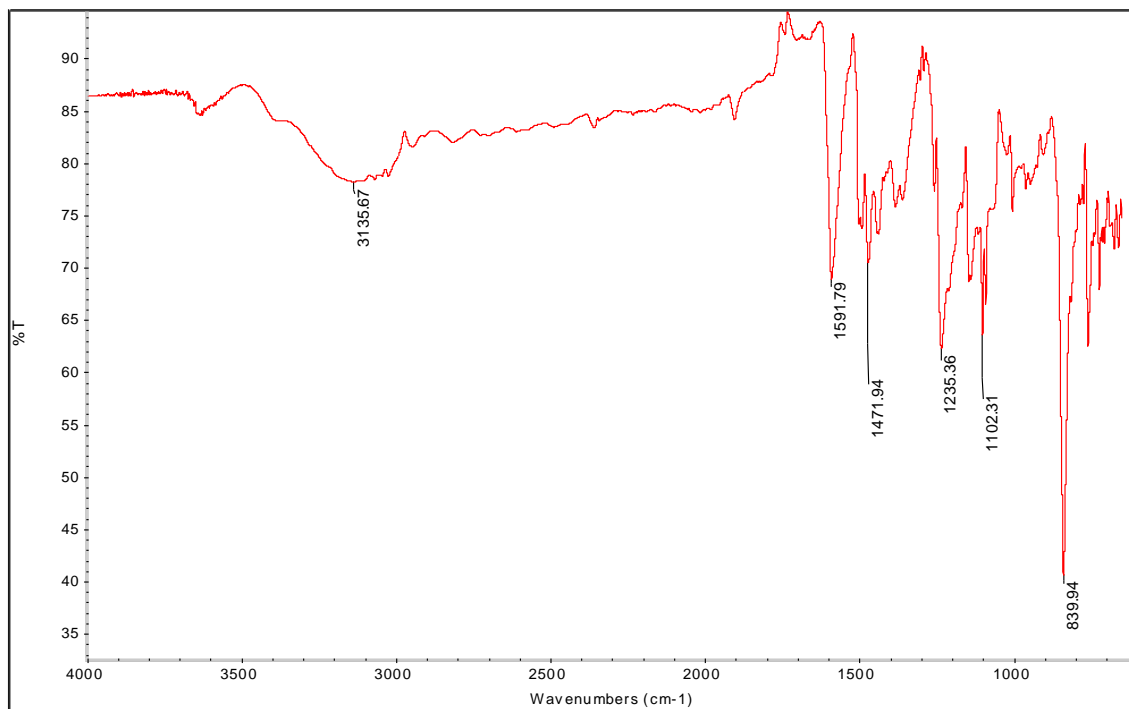

**Compound 1a:** 4-[(E)-(fluorophenyl)diazenyl]phenol (1a)

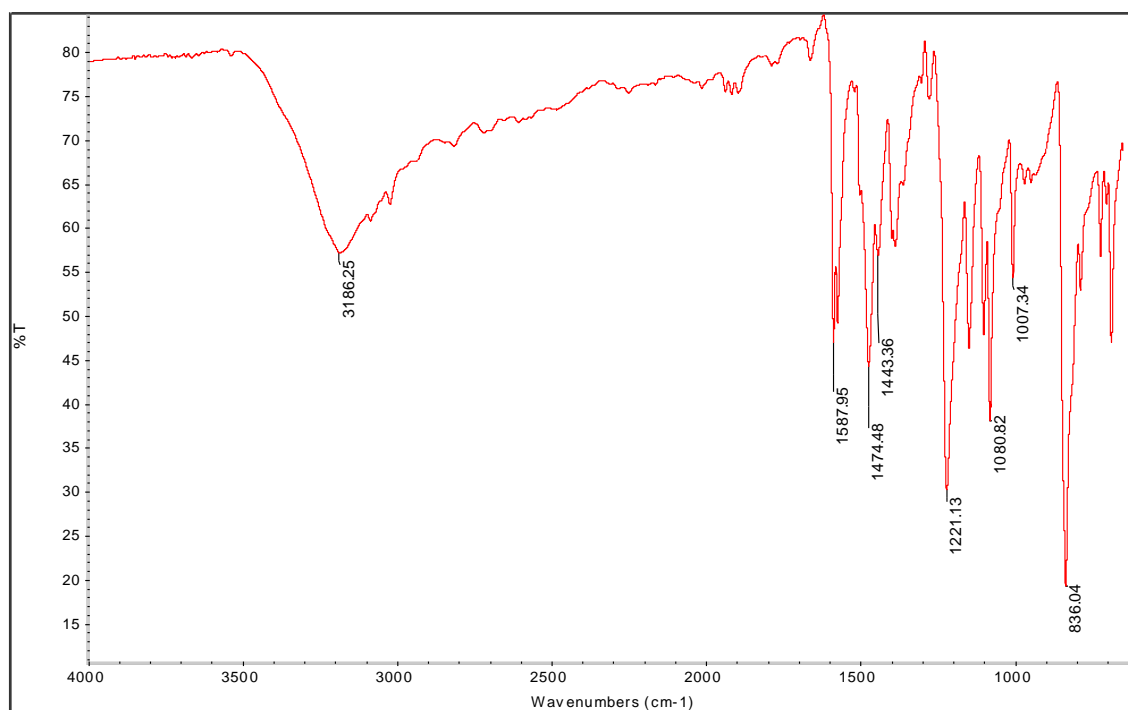

**Compound 1b :** 4-[(E)-(Chlorophenyl)diazenyl]phenol (1b)

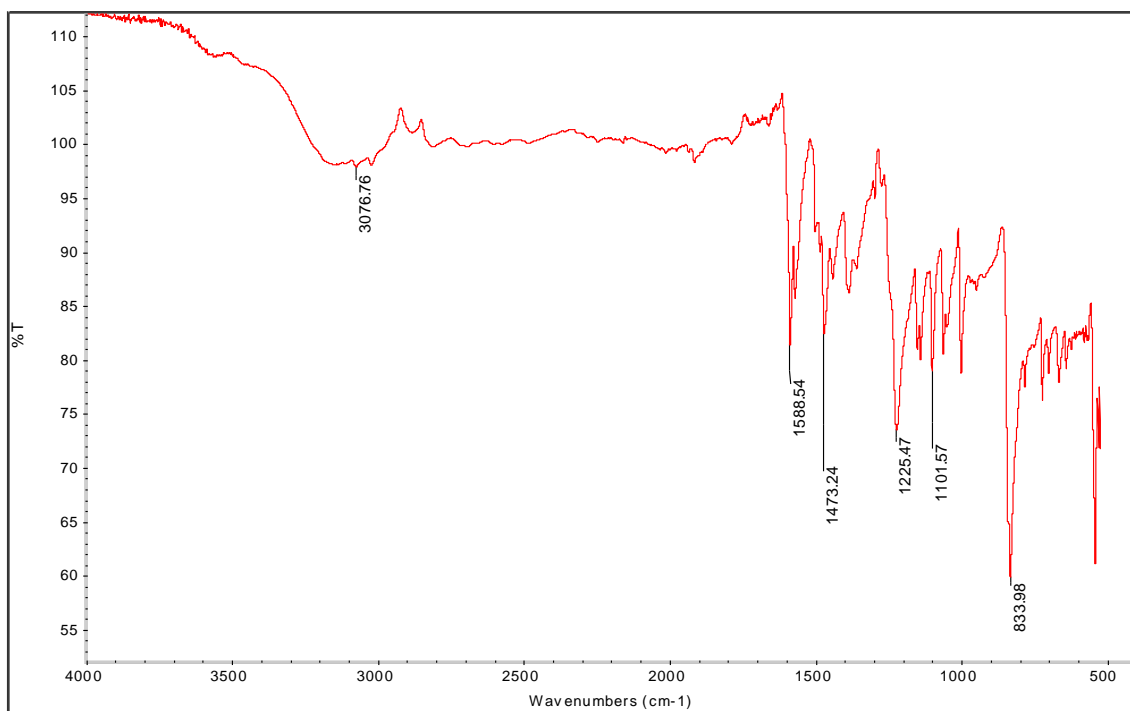

**Compound 1c: 4-[(E)-(Bromophenyl)diazenyl]phenol (1c)**

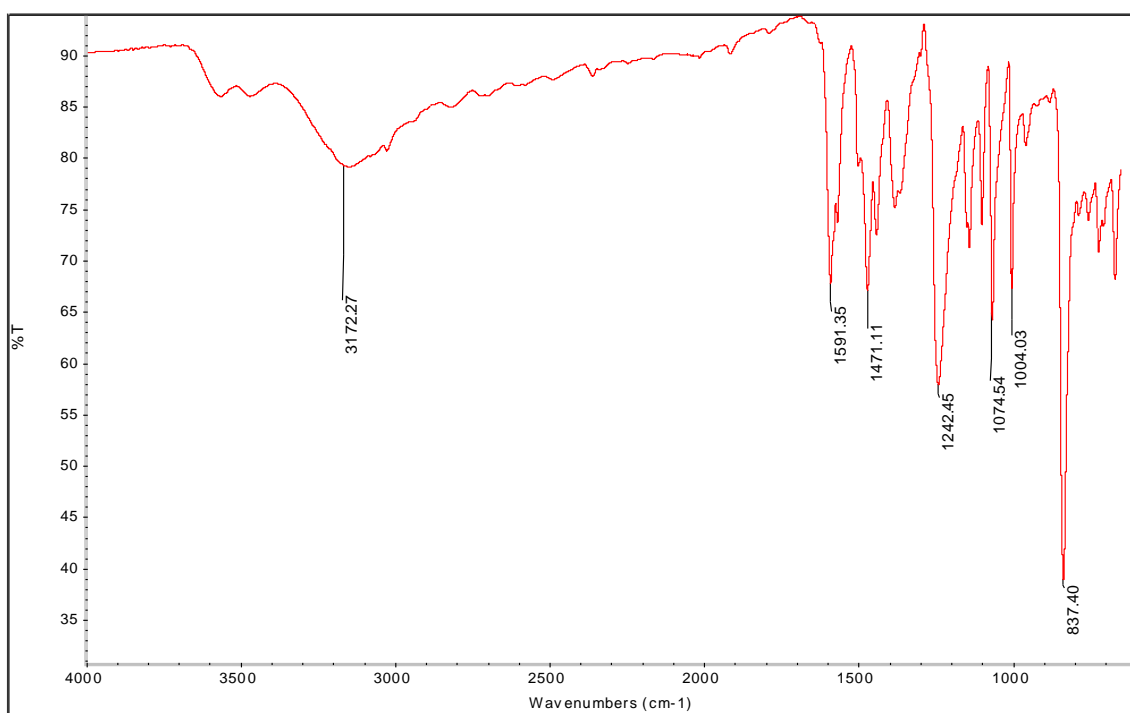

**Compound 1d: 4-[(E)-(Iodophenyl)diazenyl]phenol (1d)**

FTIR for 2.4. General Method for the Synthesis of Aspirin-Halogenated Azo Derivatives 2a–d.

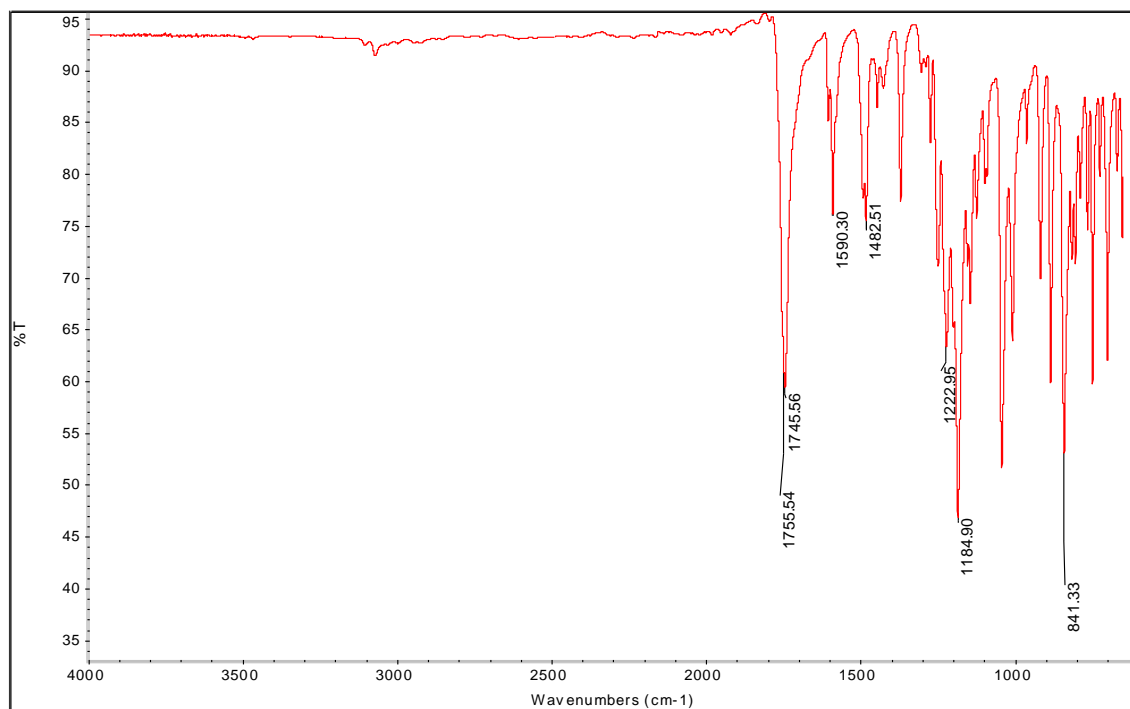

**Compound 2a:** 4-[(E)-(fluorophenyl)diazenyl] phenyl aspirinate (2a)

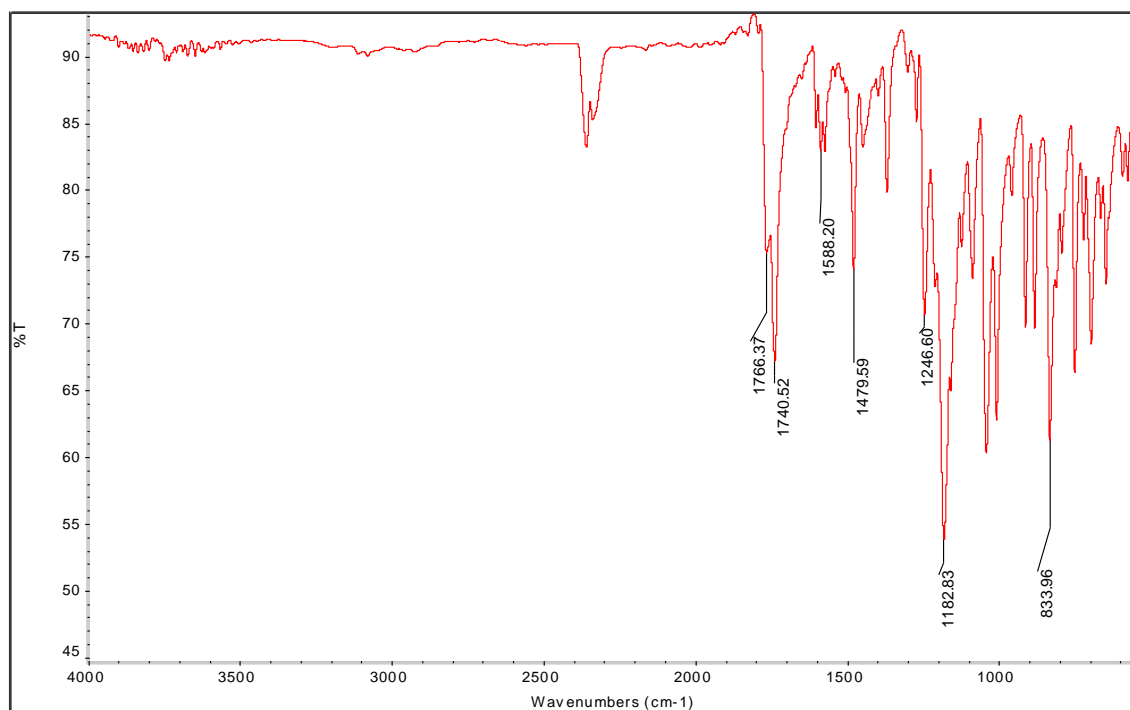

**Compound 2b:** 4-[(E)-(Chlorophenyl)diazenyl] phenyl aspirinate (2b)

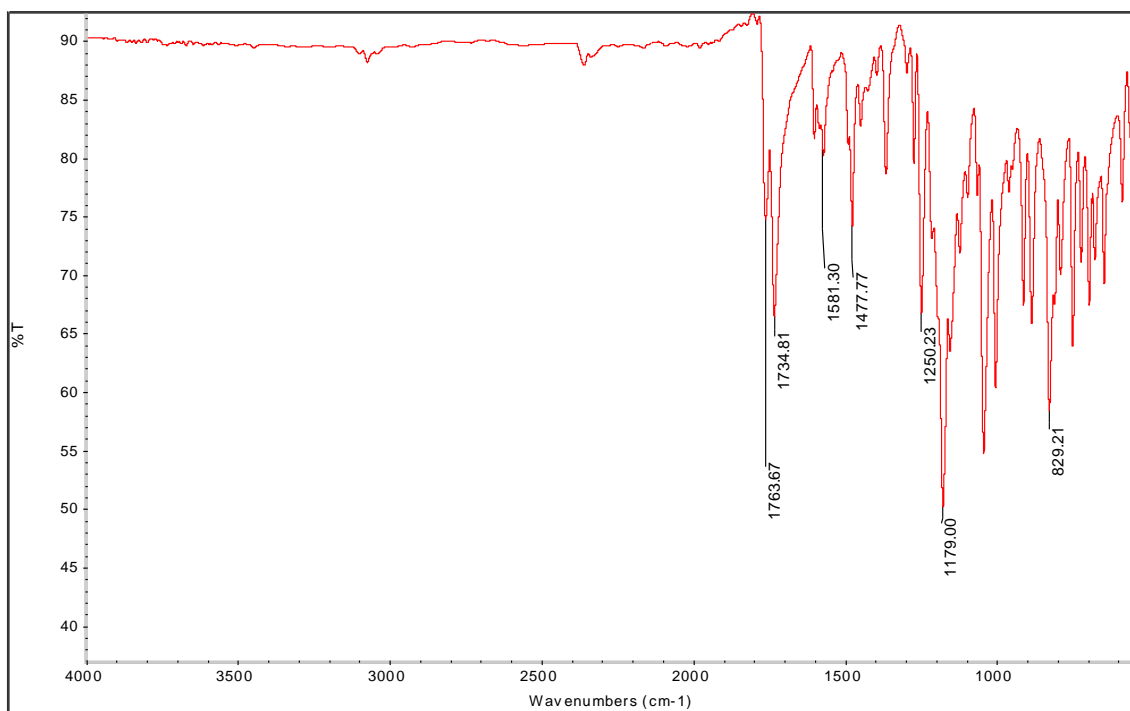

**Compound 2c:** 4-[(E)-(Bromophenyl)diazenyl] phenyl aspirinate (2c)

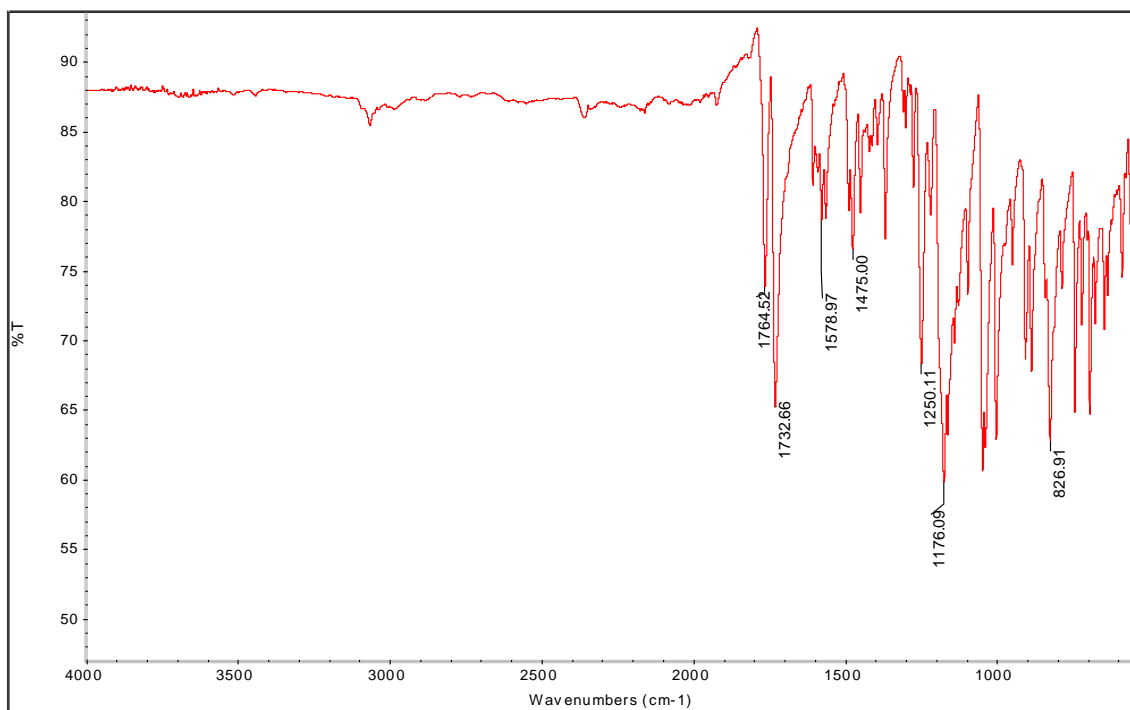

**Compound 2d:** 4-[(E)-(Iodophenyl)diazenyl] phenyl aspirinate (2d)

NMR  $^1\text{H}$  for 2.3. General Method for the Synthesis of Halogenated Azo Compounds 1a–d

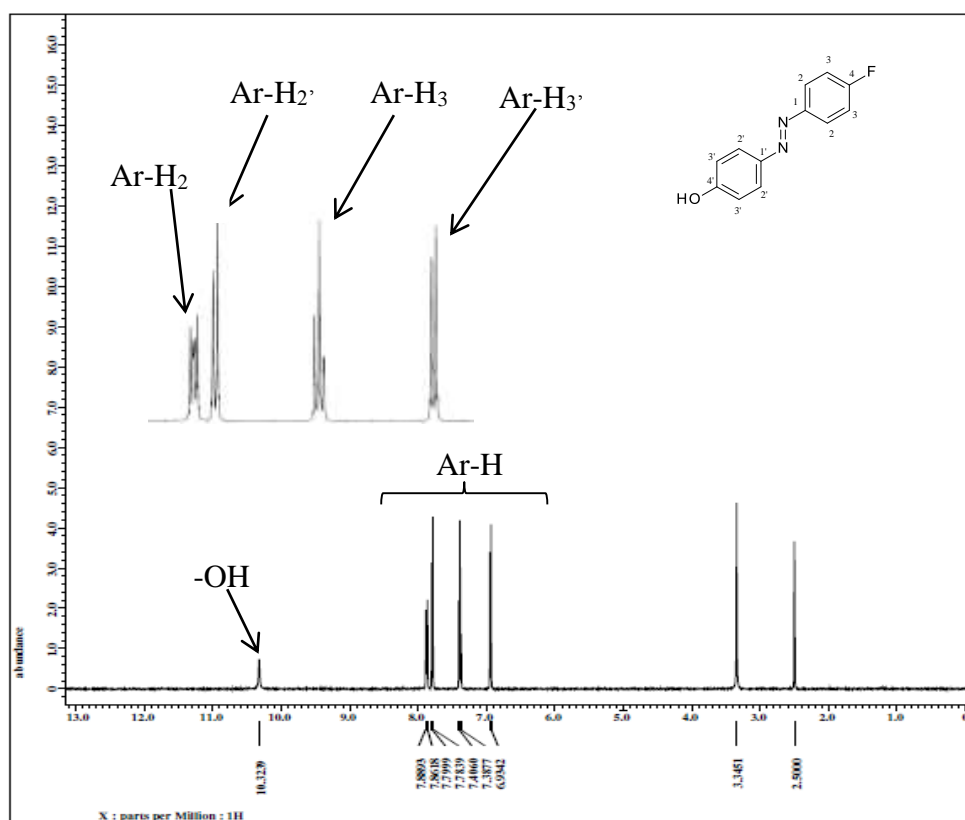

**Compound 1a:** 4-[(E)-(fluorophenyl)diazenyl]phenol (1a)

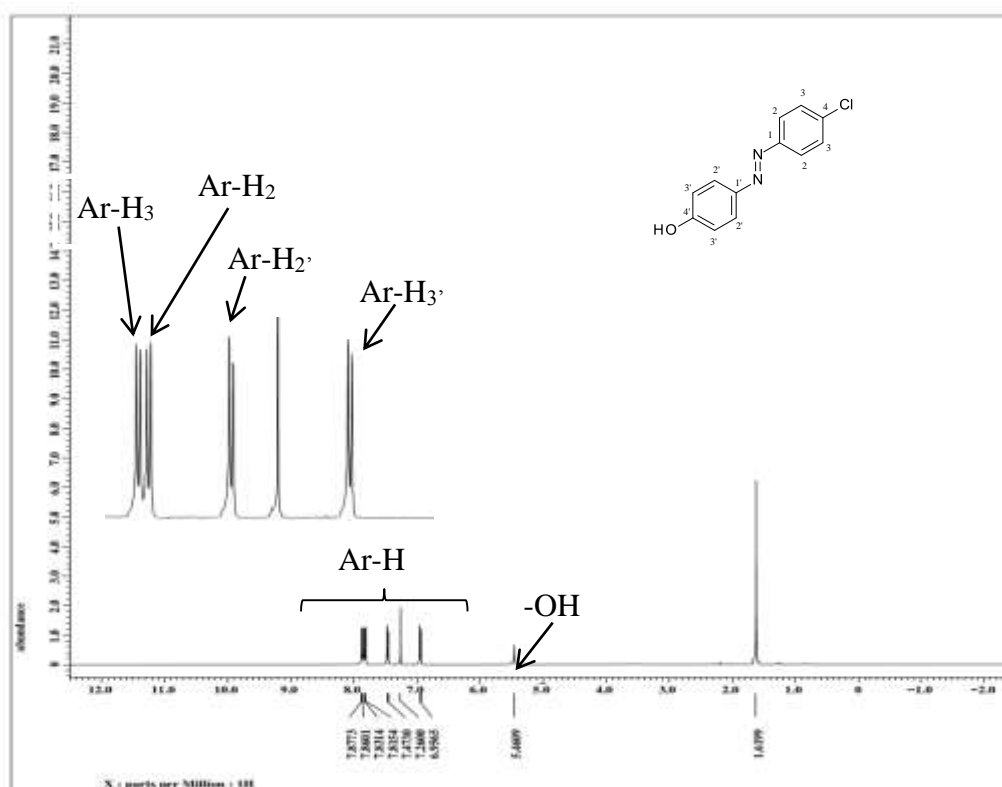

**Compound 1b:** 4-[(E)-(chlorophenyl)diazenyl]phenol (1b)

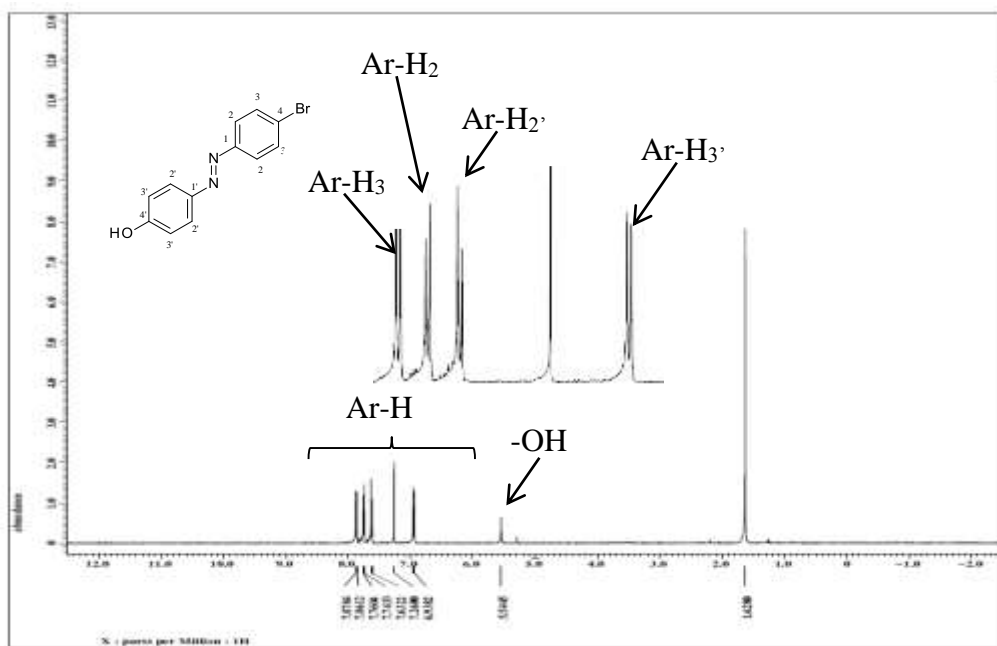

**Compound 1c:** 4-[(E)-(Bromophenyl)diazenyl]phenol (1c)

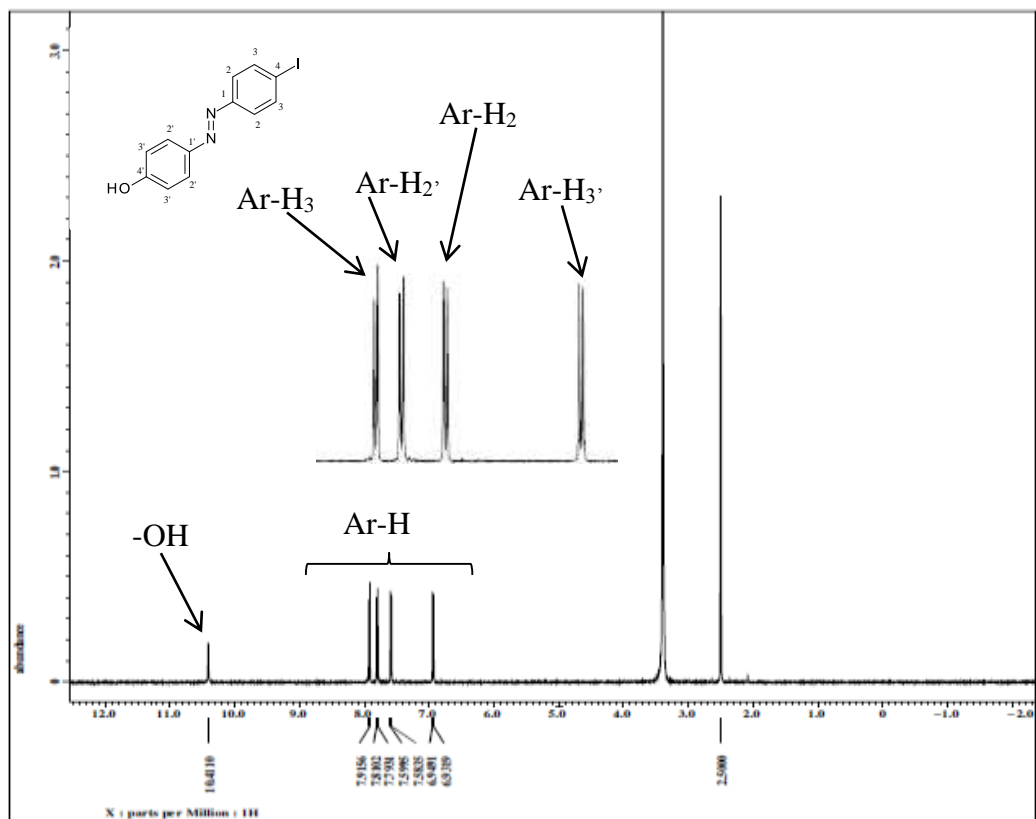

**Compound 1d:** 4-[(E)-(Iodophenyl)diazenyl]phenol (1d)

NMR  $^1\text{H}$  for 2.4. General Method for the Synthesis of Aspirin-Halogenated Azo Derivatives 2a–d.

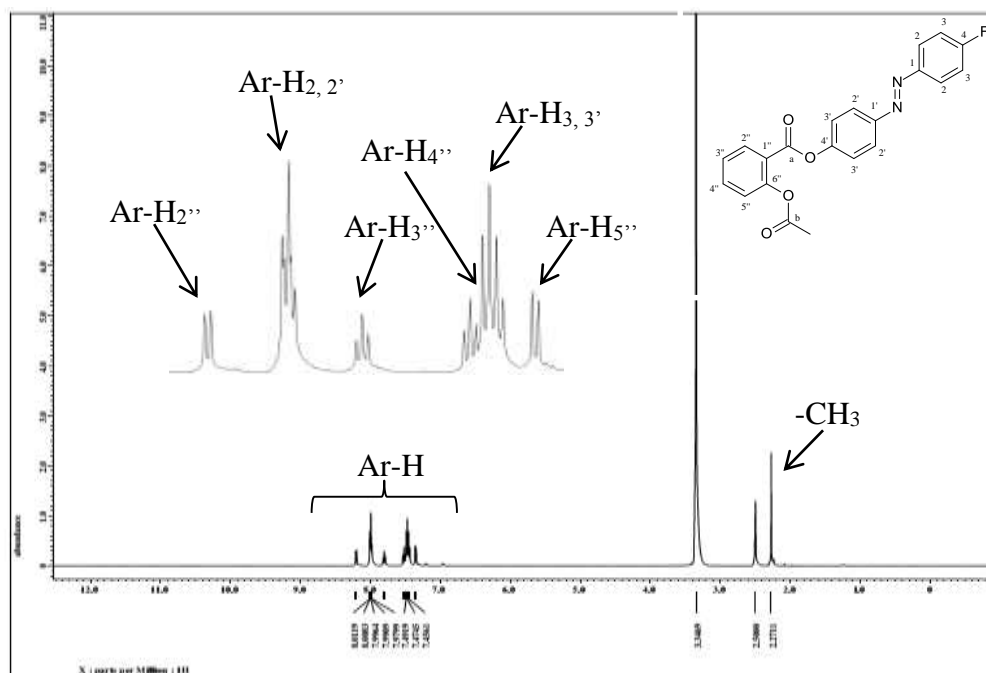

**Compound 2a:** 4-[(E)-(fluorophenyl)diazenyl] phenyl aspirinate (2a)

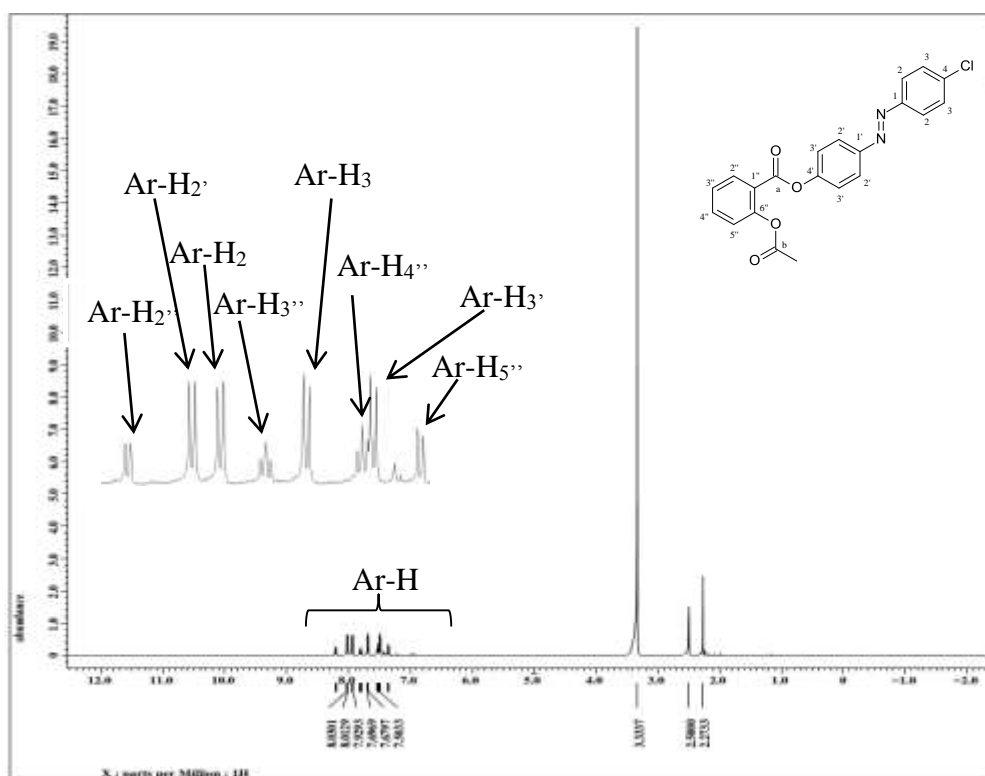

**Compound 2b:** 4-[(E)-(Chlorophenyl)diazenyl] phenyl aspirinate (2b)

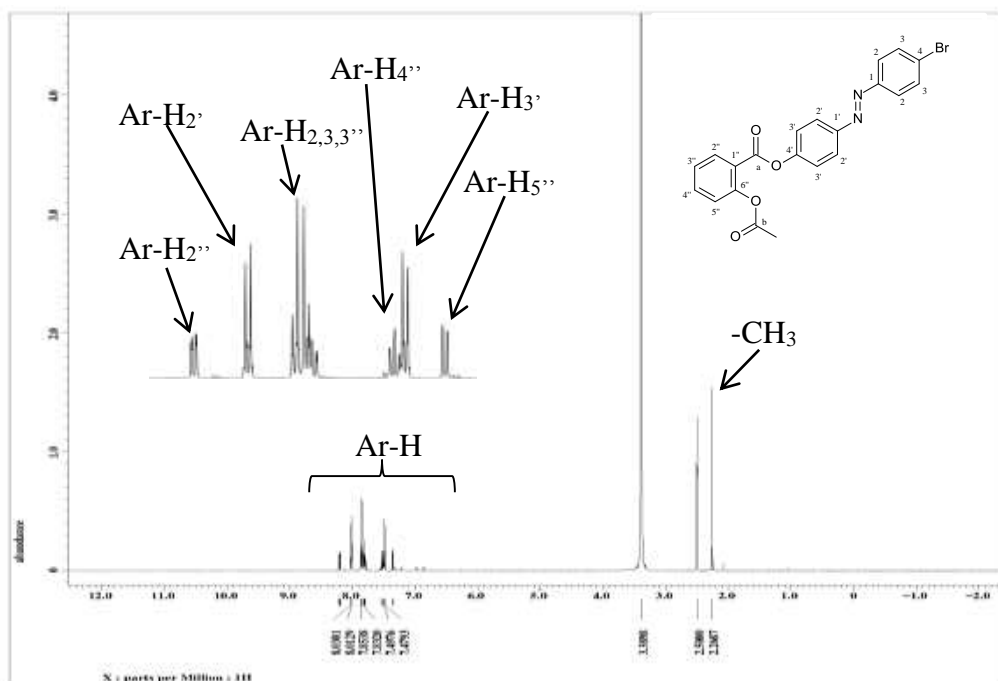

**Compound 2c: 4-[(E)-(Bromophenyl)diazenyl] phenyl aspirinate (2c)**

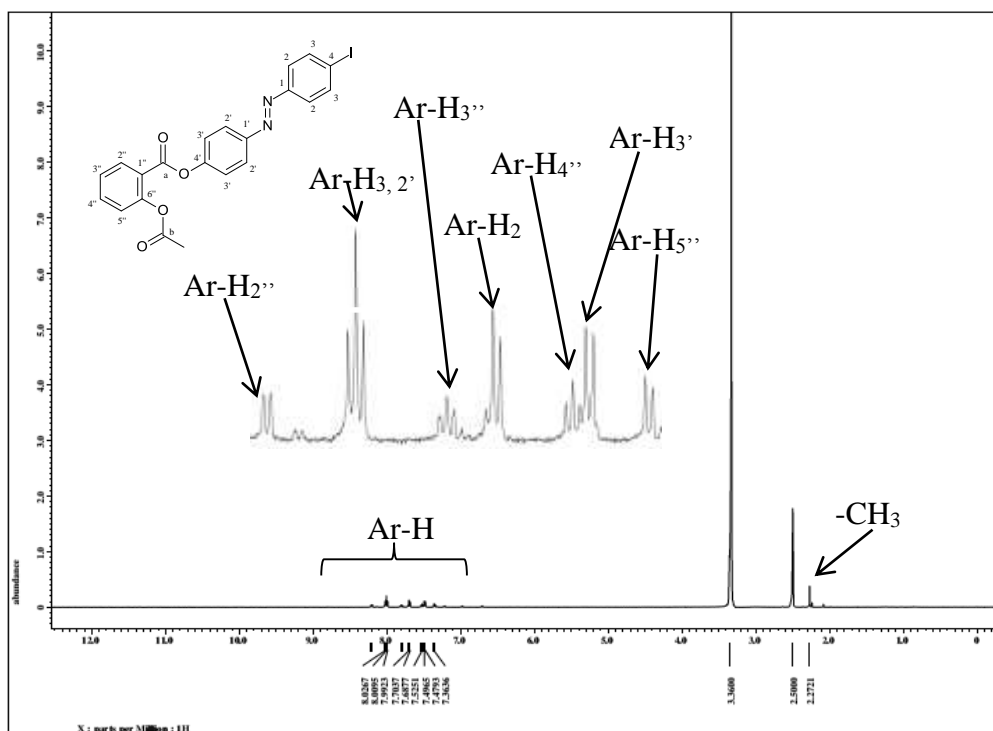

**Compound 2d: 4-[(E)-(Iodophenyl)diazenyl] phenyl aspirinate (2d)**



NMR  $^{13}\text{C}$  for 2.3. General Method for the Synthesis of Halogenated Azo Compounds 1a–d

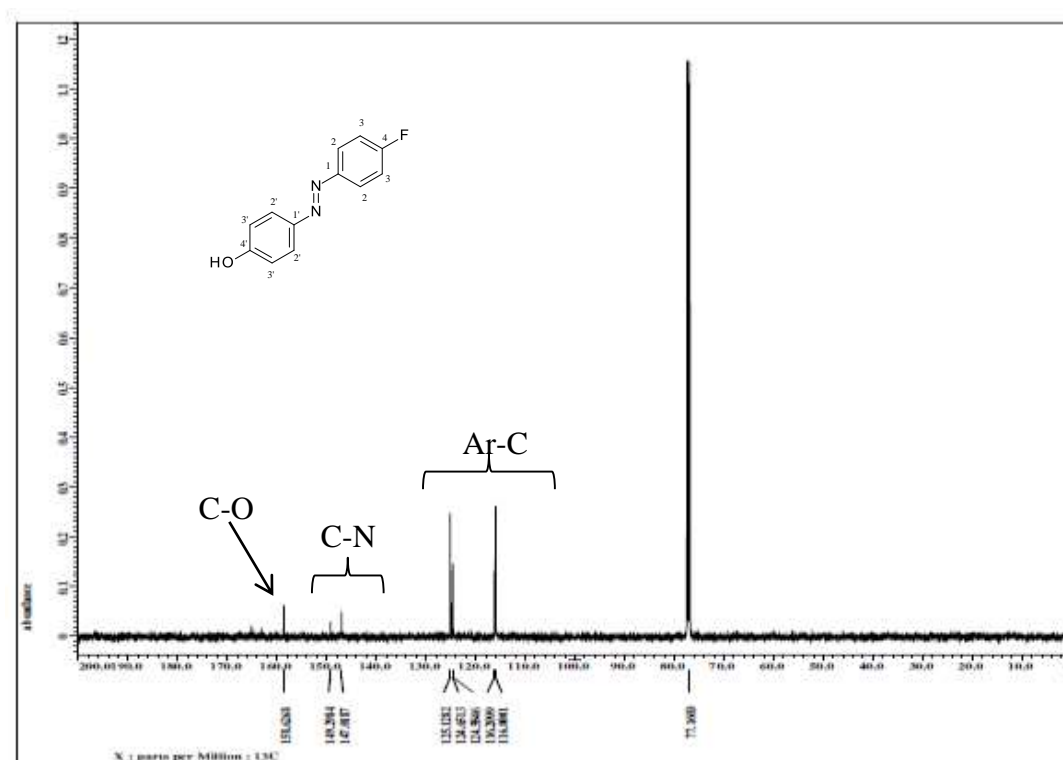

**Compound 1a:** 4-[(E)-(fluorophenyl)diazenyl]phenol (1a)

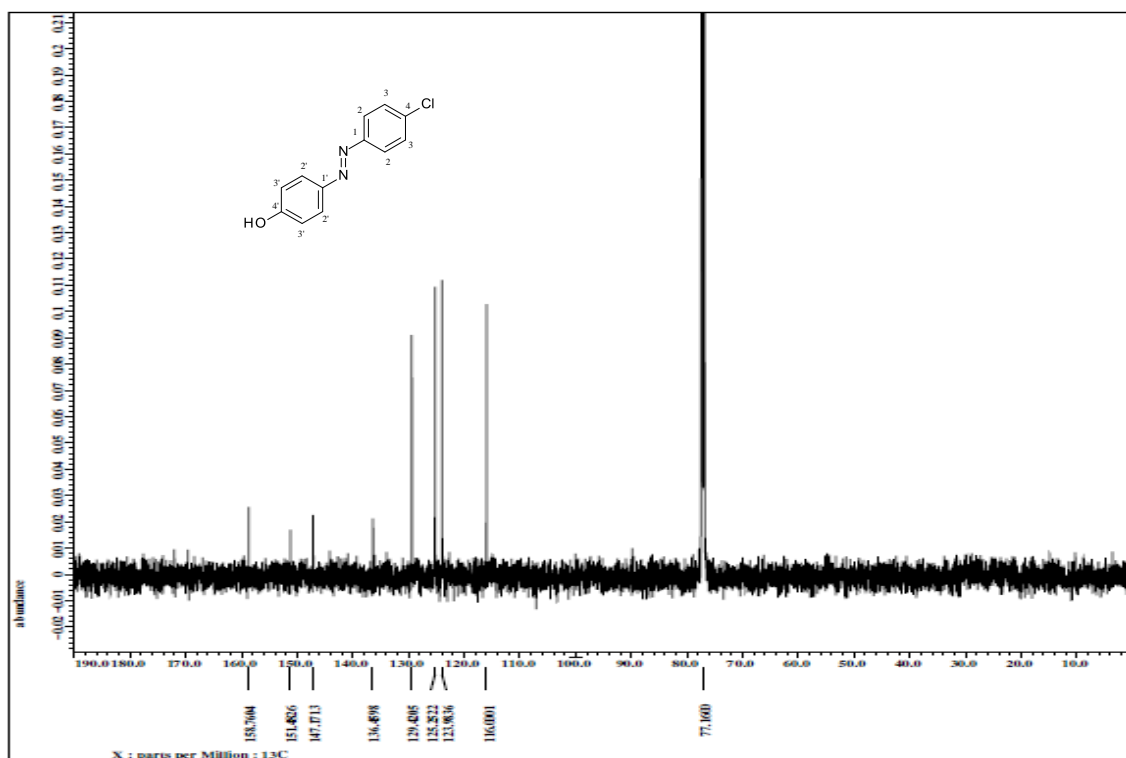

**Compound 1b:** 4-[(E)-(chlorophenyl)diazenyl]phenol (1b)

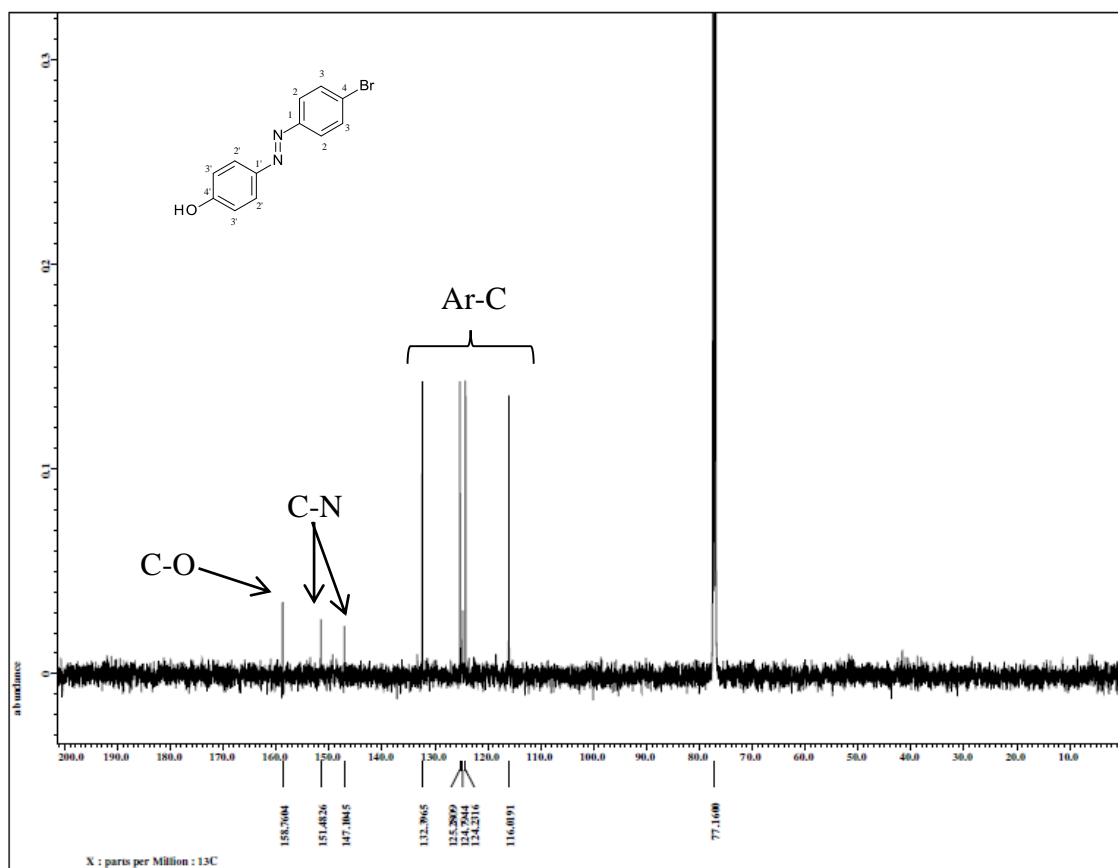

**Compound 1c: 4-[(E)-(Bromophenyl)diazenyl]phenol (1c)**

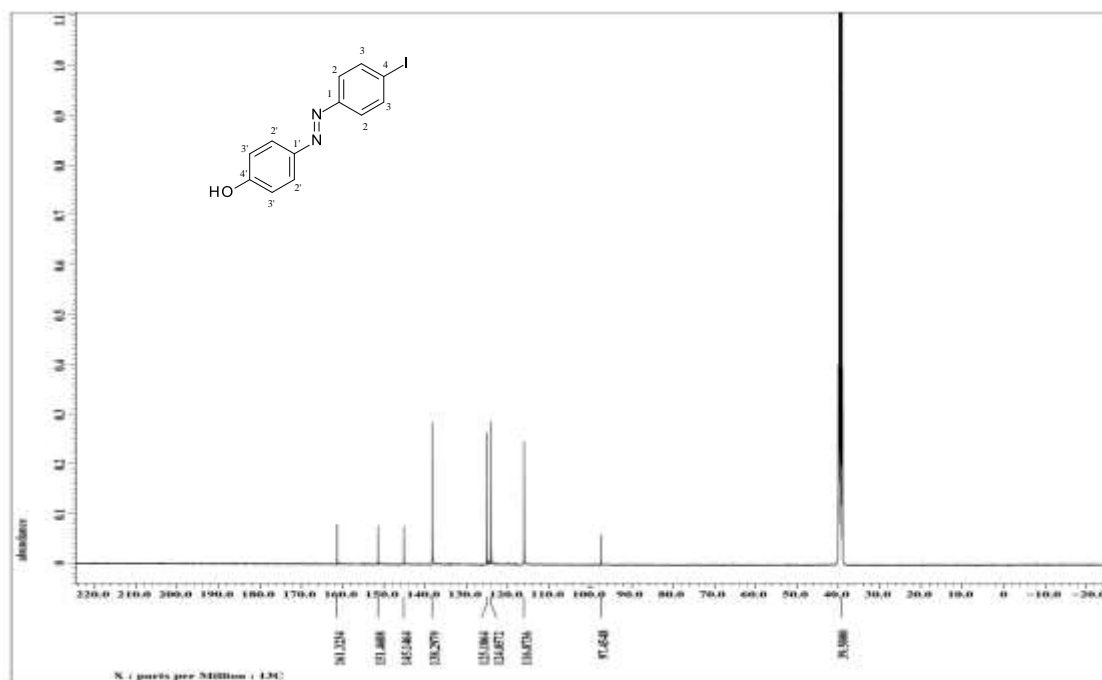

**Compound 1d: 4-[(E)-(Iodophenyl)diazenyl]phenol (1d)**

NMR  $^{13}\text{C}$  for 2.4. General Method for the Synthesis of Aspirin-Halogenated Azo Derivatives 2a-d.

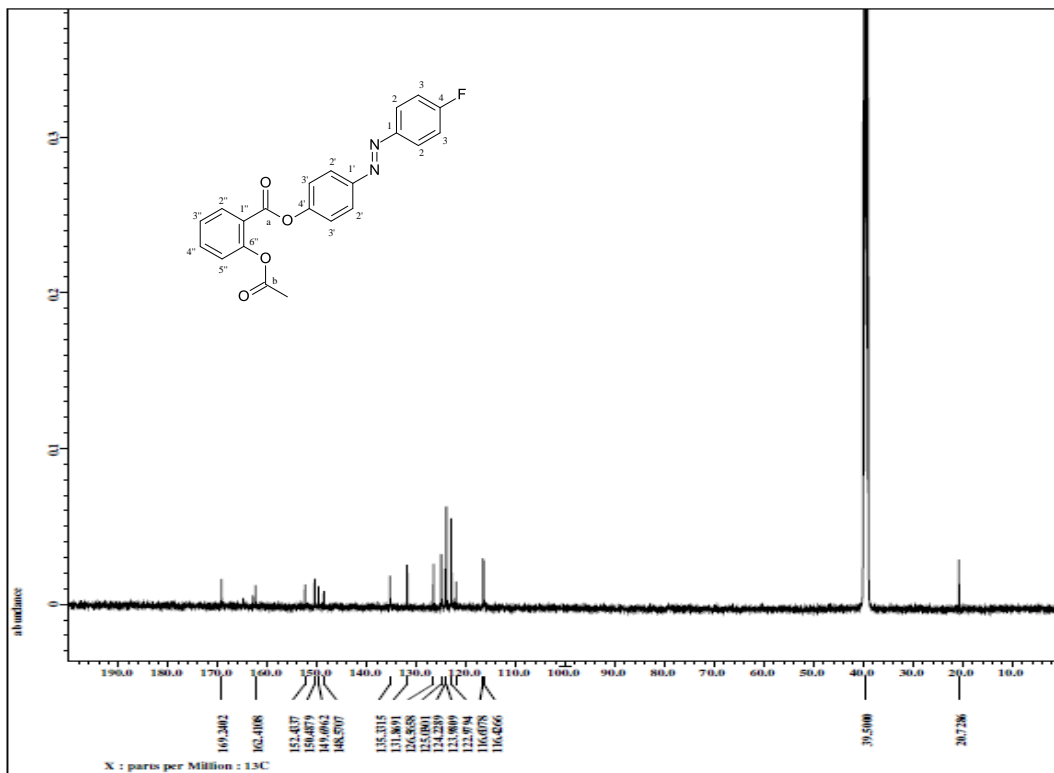

**Compound 2a:** 4-[(E)-(fluorophenyl)diazenyl] phenyl aspirinate (2a)

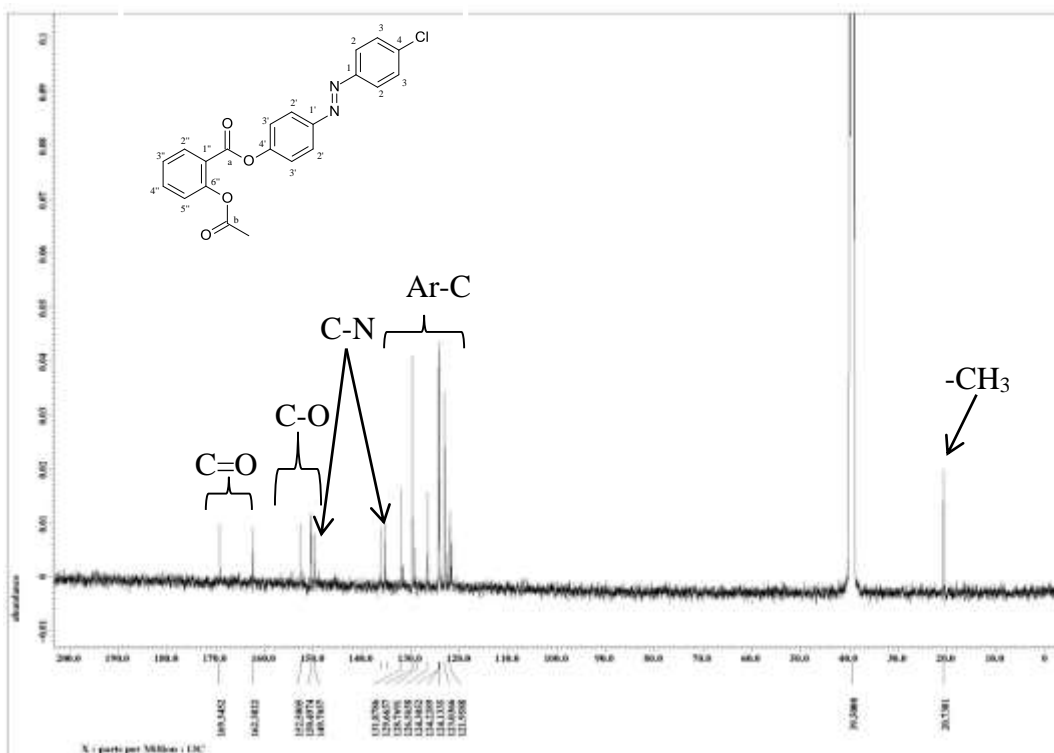

**Compound 2b:** 4-[(E)-(Chlorophenyl)diazenyl] phenyl aspirinate (2b)

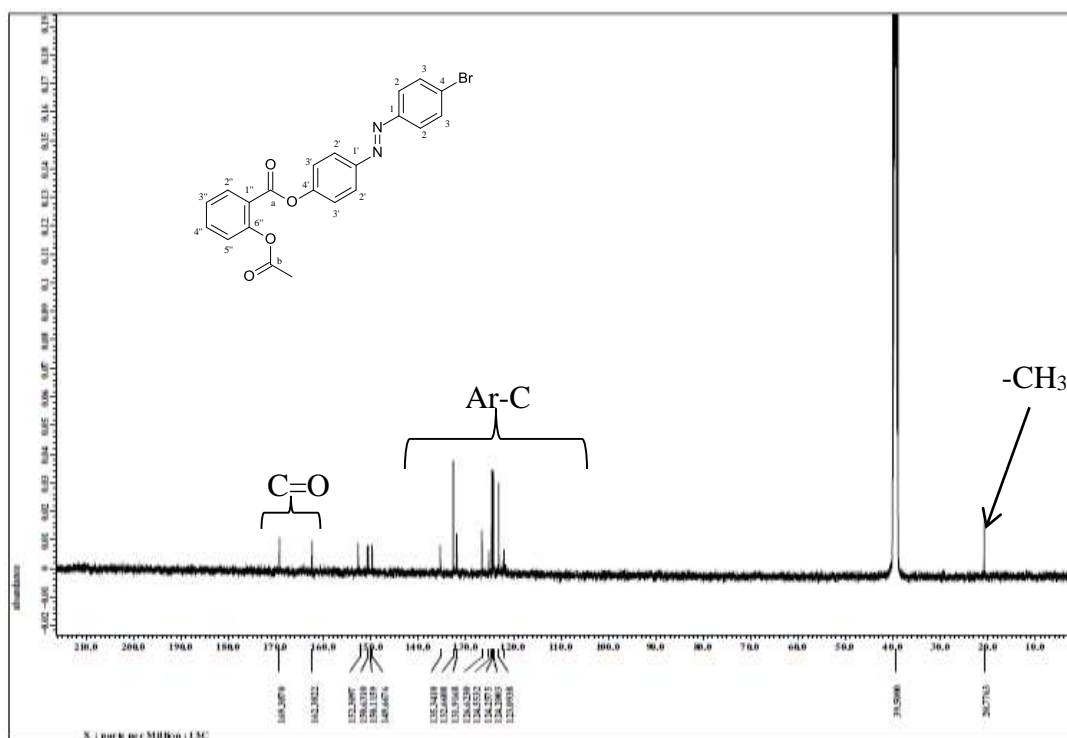

**Compound 2c:** 4-[(E)-(Bromophenyl)diazenyl] phenyl aspirinate (2c)

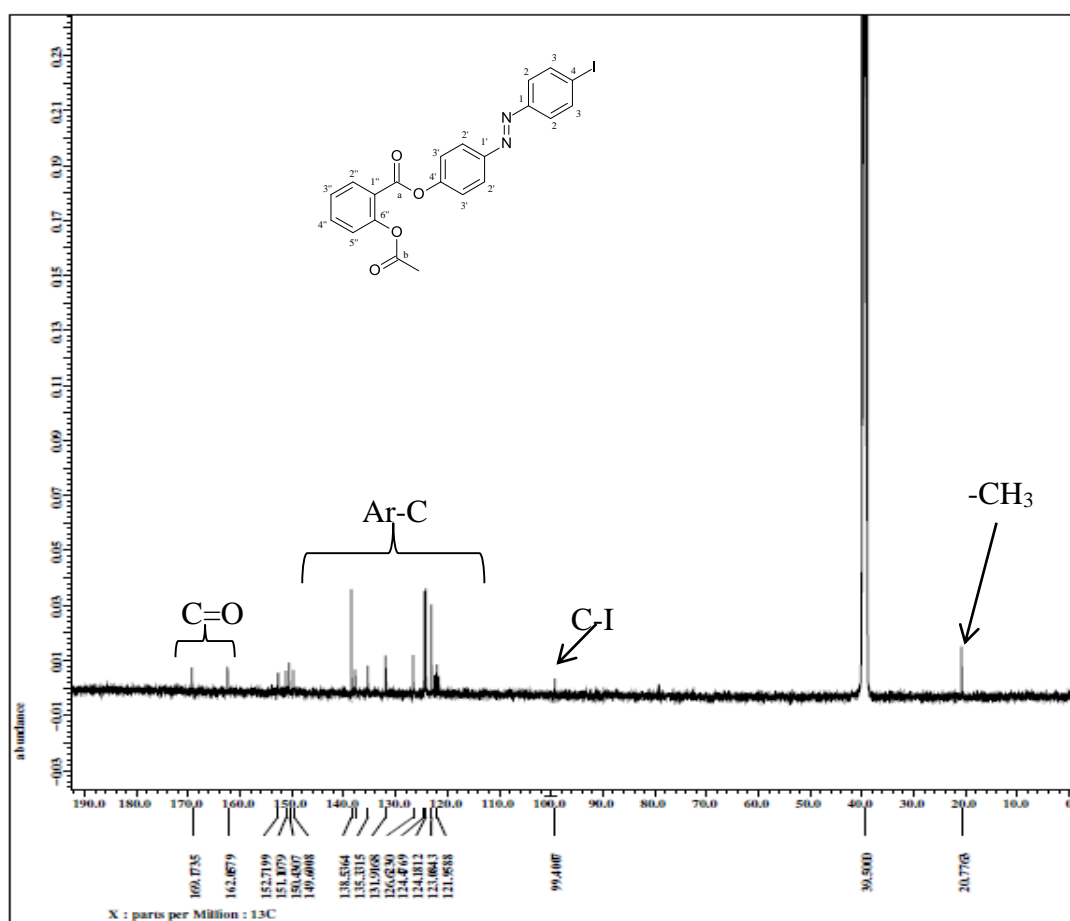

**Compound 2d:** 4-[(E)-(Iodophenyl)diazenyl] phenyl aspirinate (2d)
